# Supplementary material for: COVID-19 as ‘Game Changer’ for the Physical Activity and Mental Well-Being of Augmented Reality Game Players During the Pandemic: Mixed Methods Survey Study
Source: PubMed Central journal article supplement (PMC7758086; doi:10.2196/25117), 2020-12-22
Supplement: jmir_v22i12e25117_app2.pdf [file jmir_v22i12e25117_app2.pdf]

Multimedia Appendix 2 – Multivariate binary logistic regression analysis<sup>a</sup>

| Variable                    | B     | SE   | Wald's $\chi^2$ | df | P      | OR    | OR CI 95%     |
|-----------------------------|-------|------|-----------------|----|--------|-------|---------------|
| Constant                    | .397  | .206 | 3.711           | 1  | .054   |       |               |
| Gender                      | .672  | .115 | 33.923          | 1  | .000** | 1.958 | 1.562 – 2.455 |
| Age                         | -.020 | .006 | 11.148          | 1  | .001*  | 0.980 | 0.969 – 0.992 |
| Self-identified player type |       |      | 3.074           | 2  | .215   |       |               |
| HvCM                        | -.174 | .155 | 1.270           | 1  | .260   | 0.840 | 0.621 – 1.137 |
| CvHM                        | .890  | .123 | .530            | 1  | .467   | 1.093 | 0.860 – 1.390 |
| Game Play                   | -.007 | .003 | 4.245           | 1  | .39    | 0.993 | 0.987 – 1.000 |
| Exercise                    | -.016 | .006 | 6.991           | 1  | .008*  | 0.984 | 0.972 – 0.996 |

**Notes:** <sup>a</sup>R<sup>2</sup> =0.040 (Cox and Snell); 0.054 (Nagelkerke); Model  $\chi^2$  (6, N=1469)= 60.538; \**P*<.01 (two-tailed), \*\* *P* <.001 (two-tailed); Gender (Male=0, Female=1); HvCM (Hardcode=1, Casual=0, Midcore=0); CvHM (Casual=1, Hardcore=0, Midcore=0); Game play= Game play change score (during-COVID minus pre-COVID); Exercise=Exercise change score (during-COVID minus pre-COVID).

**Abbreviations:** SE, standard error; df, degrees of freedom; OR, odds ratio; CI, confidence interval.
